# Supplementary material
Source: MDPI journal article supplement (https://www.mdpi.com/2227-9040/9/11/319)
Supplement: s1 [file s1]

## Support Information

# Colorimetric Sensing of Benzoyl Peroxide Based on the Emission Wavelength-Shift of CsPbBr<sub>3</sub> Perovskite Nanocrystals

Li Zhang <sup>1,†</sup>, Yimeng Zhu <sup>2,†</sup>, Feiming Li <sup>2</sup>, Linchun Zhang <sup>2</sup>, Longjie You <sup>3</sup>, Zhiyong Guo <sup>1</sup>, Yaning Huang <sup>4</sup>,  
Li Zhao <sup>1</sup> and Xi Chen <sup>2,\*</sup>

<sup>1</sup> Institute of Analytical Technology and Smart Instruments, College of Environment and Public Health, Xiamen Huaxia University, Xiamen 361024, China; zhangl@hxxy.edu.cn (Li Zhang); guozy@hxxy.edu.cn (Z.G.); zl@hxxy.edu.cn (Li Zhao)

<sup>2</sup> State Key Laboratory of Marine Environmental Science, Xiamen University, Xiamen 361005, China; zhuym@xmu.edu.cn (Y.Z.); lfm1914@mnnu.edu.cn (F.L.); 20520191151446@stu.xmu.edu.cn (Linchun Zhang)

<sup>3</sup> National Quality Supervision and Inspection Center for Incense Products, Yongchun, 362600, China; ycy1j520@qzyczs.com

<sup>4</sup> Information Center, Xiamen Huaxia University, Xiamen 361024, China; hyn@hxxy.edu.cn

\* Correspondence: xichen@xmu.edu.cn; Tel.: +86-592-2184530

† These authors contributed equally to this work.

**Table S1.** The sensing applications of perovskite material

| Material                                                                      | Analyte          | Sample    | Linear Range | LOD          | Analytical Properties           | Reference |
|-------------------------------------------------------------------------------|------------------|-----------|--------------|--------------|---------------------------------|-----------|
| CsPbBr <sub>3</sub> NCs                                                       | Peroxide         | Oil       | 0-0.6g/100g  | 0.139mg/100g | Halogen exchange                | [1]       |
| CH <sub>3</sub> NH <sub>3</sub> PbBr <sub>3</sub> NCs                         | Hg <sup>2+</sup> | ---       | 0-100nM      | 0.124nM      | Cation exchange                 | [2]       |
| CsPbBr <sub>3</sub> NCs                                                       | H <sub>2</sub> S | Rat brain | 0-100μM      | 0.18μM       | Structural transformation       | [3]       |
| CsPbBr <sub>3</sub> NCs                                                       | NH <sub>3</sub>  | ---       | 25-350ppm    | 8.85ppm      | Defect passivation              | [4]       |
| CH <sub>3</sub> NH <sub>3</sub> PbBr <sub>3</sub> @SiO <sub>2</sub>           | SO <sub>2</sub>  | ---       | 0-10ppm      | 155ppb       | Electron transfer               | [5]       |
| CsPbCl <sub>1.2</sub> Br <sub>1.8</sub> NCs@ h-SiO <sub>2</sub> /KSF@EVA film | Temperature      | ---       | 30-45°C      | 0.2 °C       | Thermal quenching               | [6]       |
| CH <sub>3</sub> NH <sub>3</sub> PbI <sub>3</sub> NCs                          | MicroRNA-155     | ---       | 0.01fM-20nM  | 0.005fM      | Photoelectrochemical properties | [7]       |

**Table S2.** Comparison among the results from the present work and others found in the reference

| Method                                     | Reagent consumption | Cost | Linear range    | LOD        | RSD%      | Time needed | Sample         | Reference |
|--------------------------------------------|---------------------|------|-----------------|------------|-----------|-------------|----------------|-----------|
| Gas chromatography                         | Large               | High | 0-20µg/mL       | 3mg/kg     | 2.38-6.20 | 7min        | Flour          | [8]       |
| High performance liquid chromatography     | Large               | High | 0.07-15µg/g     | 30ng/mL    | 0.4-3.2   | 23min       | Wheat flour    | [9]       |
| Capillary electrophoresis                  | Small               | Low  | 2-100µg/mL      | 0.29µg/mL  | 1.3-3.9   | <7min       | Pharmaceutical | [10]      |
| Amperometry                                | Small               | Low  | 5.0-55µmol/L    | 2.5 µmol/L | 2.9       | 4.1s        | Wheat          | [11]      |
| Chemiluminescence                          | Small               | Low  | 0.5ng/mL-1µg/mL | 0.14ng/mL  | 1.5       | 0.46 s      | Wheat flour    | [12]      |
| Ratiometric fluorescence                   | Small               | Low  | 0-60µmol/L      | 163nmol/L  | 0.9-2.6   | <6 min      | Wheat flour    | [13]      |
| Spectrophotometry                          | Small               | Low  | 0-100µmol/L     | 0.75µg/mL  | 3.2-14.5  | 2 min       | Flour          | [14]      |
| Fluorescence method of wavelength shifting | Small               | Low  | 0-120µmol/L     | 0.13µg/mL  | 2.8-5.5   | 2 min       | Flour          | This work |

## Reference

1. Zhu, Y.; Li, F.; Huang, Y.; Lin, F.; Chen, X. Wavelength-Shift-Based Colorimetric Sensing for Peroxide Number of Edible Oil Using CsPbBr<sub>3</sub> Perovskite Nanocrystals. *Anal. Chem.* **2019**, *91*, 14183-14187.
2. Lu, L.-Q.; Tan, T.; Tian, X.-K.; Li, Y.; Deng, P. Visual and sensitive fluorescent sensing for ultratrace mercury ions by perovskite quantum dots. *Anal. Chim. Acta* **2017**, *986*, 109-114.
3. Chen, C.; Cai, Q.; Luo, F.; Dong, N.; Guo, L.; Qiu, B.; Lin, Z. Sensitive Fluorescent Sensor for Hydrogen Sulfide in Rat Brain Microdialysis via CsPbBr<sub>3</sub> Quantum Dots. *Anal. Chem.* **2019**, *91*, 15915-15921.
4. Huang, H.; Hao, M.; Song, Y.; Dang, S.; Liu, X.; Dong, Q. Dynamic Passivation in Perovskite Quantum Dots for Specific Ammonia Detection at Room Temperature. *Small* **2020**, *16*, 1904462.
5. You, X.; Wu, J.; Chi, Y. Superhydrophobic Silica Aerogels Encapsulated Fluorescent Perovskite Quantum Dots for Reversible Sensing of SO<sub>2</sub> in a 3D-Printed Gas Cell. *Anal. Chem.* **2019**, *91*, 5058-5066.
6. Huang, Y.; Lai, Z.; Jin, J.; Lin, F.; Li, F.; Lin, L.; Tian, D.; Wang, Y.; Xie, R.; Chen, X. Ultrasensitive Temperature Sensing Based on Ligand-Free Alloyed CsPbCl<sub>x</sub>Br<sub>3-x</sub> Perovskite Nanocrystals Confined in Hollow Mesoporous Silica with High Density of Halide Vacancies. *Small* **2021**, 2103425.
7. Pang, X.; Qi, J.; Zhang, Y.; Ren, Y.; Su, M.; Jia, B.; Wang, Y.; Wei, Q.; Du, B. Ultrasensitive photoelectrochemical aptasensing of miR-155 using efficient and stable CH<sub>3</sub>NH<sub>3</sub>PbI<sub>3</sub> quantum dots sensitized ZnO nanosheets as light harvester. *Biosens. Bioelectron.* **2016**, *85*, 142-150.
8. Zhang, S. Detection of benzoyl peroxide in food by gas chromatography. *J. Food Saf. Qual.* **2016**, *7*, 353-356.
9. Abe-Onishi, Y.; Yomota, C.; Sugimoto, N.; Kubota, H.; Tanamoto, K. Determination of benzoyl peroxide and benzoic acid in wheat flour by high-performance liquid chromatography and its identification by high-performance liquid chromatography-mass spectrometry. *J. Chromatogr. A* **2004**, *1040*, 209-214, doi:10.1016/j.chroma.2004.03.059.
10. Mu, G.; Liu, H.; Gao, Y.; Luan, F. Determination of benzoyl peroxide, as benzoic acid, in wheat flour by capillary electrophoresis compared with HPLC. *J. Sci. Food Agric.* **2011**, *92*, 960-964, doi:10.1002/jsfa.4677.
11. Kozan, J.; Silva, R.; Serrano, S.; Lima, A.; Angnes, L. Amperometric detection of benzoyl peroxide in pharmaceutical preparations using carbon paste electrodes with peroxidases naturally immobilized on coconut fibers. *Biosens. Bioelectron.* **2010**, *25*, 1143-1148, doi:10.1016/j.bios.2009.09.044.
12. Yang, W.-P.; Zhang, Z.-J.; Hun, X. A novel capillary microliter droplet sample injection-chemiluminescence detector and its application to the determination of benzoyl peroxide in wheat flour. *Talanta* **2003**, *62*, 661-666, doi:10.1016/j.talanta.2003.08.036.
13. Hu, Q.; Li, W.; Qin, C.; Zeng, L.; Hou, J.-T. Rapid and Visual Detection of Benzoyl Peroxide in Food by a Colorimetric and Ratiometric Fluorescent Probe. *J. Agric. Food Chem.* **2018**, *66*, 10913-10920, doi:10.1021/acs.jafc.8b04733.
14. Lin, T.; Zhang, M.; Xu, F.; Wang, X.; Xu, Z.; Guo, L. Colorimetric detection of benzoyl peroxide based on the etching of silver nanoshells of Au@Ag nanorods. *Sensors Actuators B Chem.* **2018**, *261*, 379-384, doi:10.1016/j.snb.2018.01.172.
